# Supplementary material for: Controlling block copolymer one-dimensional self-assembly in polymeric matrices
Source: Royal Society of Chemistry journal article supplement (doi:10.1039/d3sm00238a), 2023-01-01
Supplement: d3sm00238a1.pdf [file d3sm00238a1.pdf]

Electronic supplementary information to

# Controlling block copolymer one-dimensional self-assembly in polymeric matrices

Jessica Gutiérrez González,<sup>†</sup> Marcelo Ceolín,<sup>§</sup> Walter F. Schroeder,<sup>†</sup> and Ileana A. Zucchi<sup>\*†</sup>

<sup>†</sup> Institute of Materials Science and Technology (INTEMA), University of Mar del Plata and National Research Council (CONICET), Av. Cristóbal Colón 10850, B7606WV Mar del Plata, Argentina

<sup>§</sup> Instituto de Investigaciones Fisicoquímicas Teóricas y Aplicadas (INIFTA), Universidad Nacional de La Plata, CONICET, CC 16-Suc. 4, 1900 La Plata, Argentina

\* Author for correspondence: [izucchi@fi.mdp.edu.ar](mailto:izucchi@fi.mdp.edu.ar) (I.A. Zucchi)

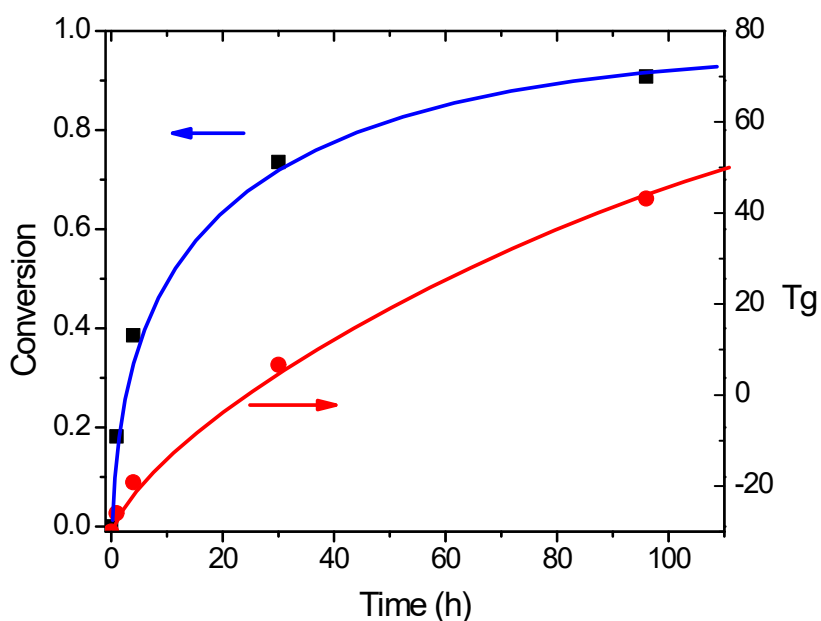

Figure S-1: Conversion of vinyl groups and evolution of Tg of the matrix as a function of irradiation time at RT. The lines are drawn to guide the eye.

Styrene monomer was photocured in bulk at room temperature. A two-component system consisting in CQ (2 wt%) and EDMAB (2 wt%) was employed as photoinitiator of the radical polymerization. CQ has a maximum of absorption in  $\lambda=460\text{nm}$ , which allow the use of visible light to photocure the samples. The role of EDMAB is to catalyze the reaction. The reaction mechanism is briefly explained here: CQ is first excited to its singlet by visible light irradiation but rapidly undergoes intersystem crossing to its triplet. The excited triplet state is reduced by EDMAB to generate ketyl and  $\alpha$ -amino free radicals. While the free ketyl radicals only dimerize, the amino free radicals initiate the polymerization of St. Figure S-1 shows the conversion of styrene as a function of irradiation time, measured by size exclusion chromatography. As can be appreciated, 96 hours of irradiation were necessary to achieve a conversion close to 0.9.

The evolution of the glass transition temperature of the reacting system as a function of conversion ( $x$ ) was calculated using equation 1 (*Journal of Polymer Science Part B: Polymer Physics*, 1990, 28, 85–95) Where  $Tg_0$  is the glass transition temperature of the initial reactive mixture,  $Tg_\infty$  is the glass transition temperature of the matrix polymerized to full conversion, and  $\lambda = \Delta cp_\infty / \Delta cp_0$ , is the ratio of changes in the specific heat through the glass transition for the fully polymerized matrix and the initial sample.

$$(Tg - Tg_0)/(Tg_\infty - Tg_0) = \lambda x/[1 - (1 - \lambda)x] \quad (1)$$

Figure S-1 shows the obtained conversion-time curve (squares) and the evolution of the Tg of the matrix with the conversion degree (dots) as predicted by equation 1, where  $\lambda=0.158$ ,  $Tg_0=-30$  °C and  $Tg_\infty=90$  °C.

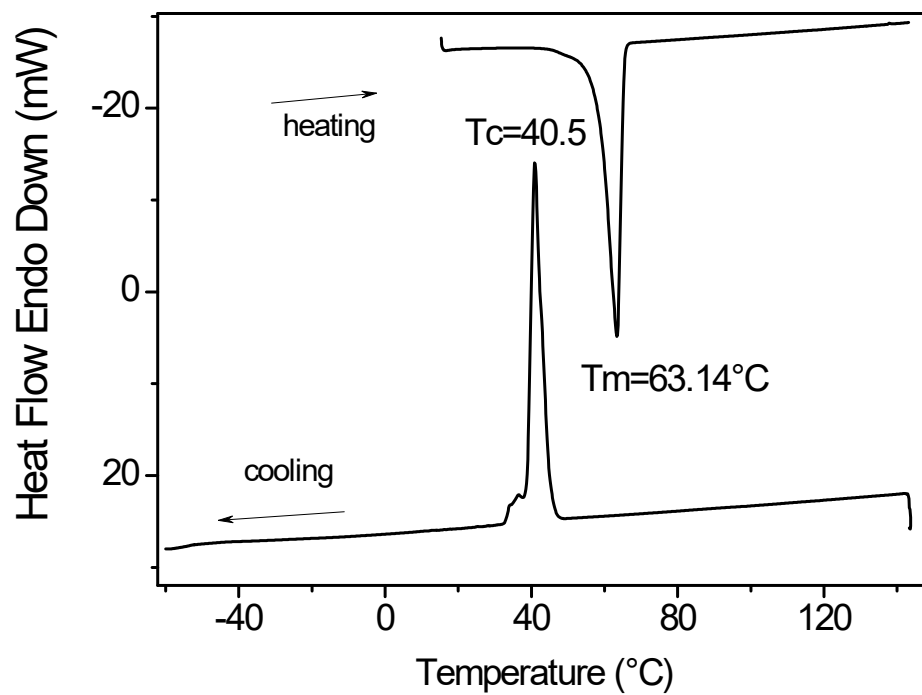

Figure S-2: DSC cooling and heating scan at 10°C/min of PEO homopolymer ( $M_n = 13,000$ Da).

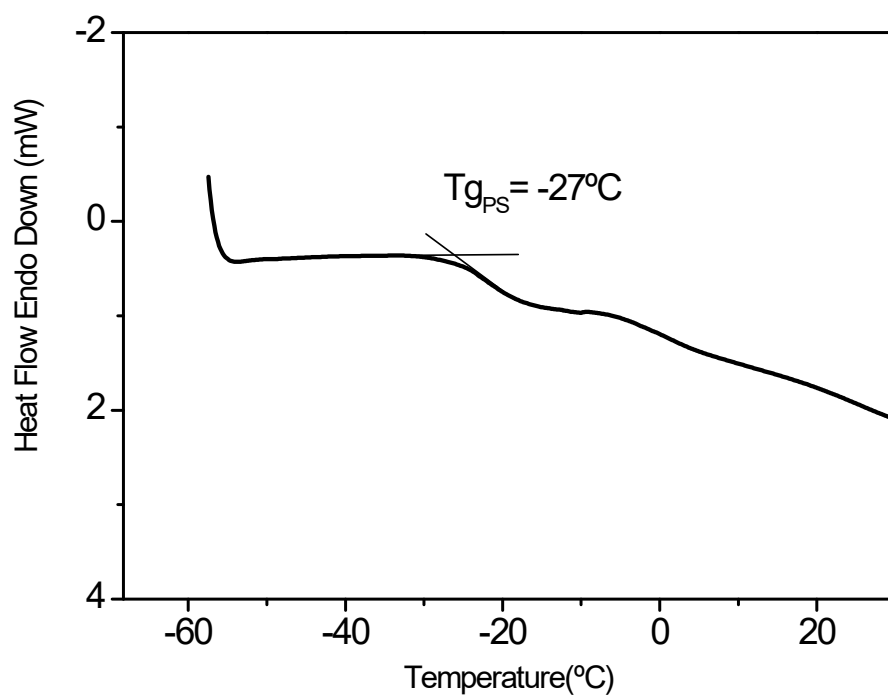

Figure S-3: Glass transition temperature of the matrix at the moment that PEO-block microphase separates,  $T_{g,matrix} = -27^{\circ}C$ .
